# Supplementary material for: Sophisticated Framework between Cell Cycle Arrest and Apoptosis Induction Based on p53 Dynamics
Source: PubMed Central journal article supplement (PMC2650779; doi:10.1371/journal.pone.0004795), 2009-03-10
Supplement: pone.0004795.s001.pdf [file pone.0004795.s001.pdf]

**Table S1** Dependent variables in the reaction scheme

| <b><i>p53 oscillation system</i></b>       |                      |                                    |                                                       |
|--------------------------------------------|----------------------|------------------------------------|-------------------------------------------------------|
| <i>p53</i>                                 | p53                  | <i>DNA damage</i>                  | DNA damage                                            |
| <i>Mdm2</i>                                | Mdm2                 | <i>Deg</i>                         | DNA damage degradation                                |
| <i>Ii</i>                                  | intermediator II     |                                    |                                                       |
| <b><i>G2/M phase cell cycle arrest</i></b> |                      |                                    |                                                       |
| <i>Chk1</i>                                | Chk1                 | <i>transducer</i>                  | DNA damage transducer                                 |
| <i>Chk1p</i>                               | Chk1p                | <i>p21:aMPF</i>                    | p21:aMPF complex                                      |
| <i>p21</i>                                 | p21                  | <i>iCdc25p:14_3_3</i>              | iCdc25p:14-3-3 complex                                |
| <i>Wee1</i>                                | Wee1                 | <i>Wee1p</i>                       | Wee1p                                                 |
| <i>iMPF</i>                                | inactive MPF         | <i>aMPF</i>                        | active MPF                                            |
| <i>aCdc25</i>                              | active Cdc25         | <i>aCdc25p</i>                     | active Cdc25p                                         |
| <i>iCdc25</i>                              | inactive Cdc25       | <i>iCdc25p</i>                     | inactive Cdc25p                                       |
| <i>14_3_3</i>                              | 14-3-3               |                                    |                                                       |
| <b><i>Apoptosis induction system</i></b>   |                      |                                    |                                                       |
| <i>Apaf_1</i>                              | Apaf-1               | <i>Cytc:Apaf_1</i>                 | Cytochrome C:Apaf-1 complex                           |
| <i>casp9</i>                               | caspase9             | <i>apop:pro9<sub>2</sub></i>       | apoptosome:procaspase9 <sub>2</sub> complex           |
| <i>IAP</i>                                 | IAP                  | <i>casp9:IAP</i>                   | caspase9:IAP complex                                  |
| <i>pro9</i>                                | procaspase9          | <i>apop:pro9</i>                   | apoptosome:procaspase9 complex                        |
| <i>apop</i>                                | apoptosome           | <i>apop:casp9<sub>2</sub></i>      | apoptosome:caspase9 <sub>2</sub>                      |
| <i>pro3</i>                                | procaspase3          | <i>apop:casp9</i>                  | apoptosome:caspase9 complex                           |
| <i>casp8</i>                               | caspase8             | <i>apop:casp9:IAP</i>              | apoptosome:caspase9:IAP complex                       |
| <i>casp3</i>                               | caspase3             | <i>p21:Pro3</i>                    | p21:procaspase3 complex                               |
| <i>Bid</i>                                 | Bid                  | <i>apop:casp9<sub>2</sub>:IAP</i>  | apoptosome:caspase9 <sub>2</sub> :IAP complex         |
| <i>Bcl_2</i>                               | Bcl-2                | <i>casp3:IAP</i>                   | caspase3:IAP complex                                  |
| <i>Bax</i>                                 | Bax                  | <i>casp9:pro3</i>                  | caspase9:pro3 complex                                 |
| <i>tBid</i>                                | tBid                 | <i>apop:casp9<sub>2</sub>:pro3</i> | apoptosome:caspase9 <sub>2</sub> :procaspase3 complex |
| <i>Cytc<sub>mito</sub></i>                 | Cytc <sub>mito</sub> | <i>casp8:Bid</i>                   | caspase8:Bid complex                                  |
| <i>Bax<sub>2</sub></i>                     | Bax <sub>2</sub>     | <i>casp3:Bid</i>                   | caspase3:Bid complex                                  |
| <i>tBid<sub>mito</sub></i>                 | tBid <sub>mito</sub> | <i>casp3:Bcl_2</i>                 | caspase3:Bcl-2 complex                                |
| <i>Cytc</i>                                | Cytc                 | <i>tBid:Bax</i>                    | tBid:Bax complex                                      |
