# Supplementary material for: Sophisticated Framework between Cell Cycle Arrest and Apoptosis Induction Based on p53 Dynamics
Source: PubMed Central journal article supplement (PMC2650779; doi:10.1371/journal.pone.0004795), 2009-03-10
Supplement: pone.0004795.s002.pdf [file pone.0004795.s002.pdf]

**Table S2** Mass balance equations***p53 oscillation system***

$$\frac{dp53}{dt} = k_{1p}' + k_{2p}' \cdot (DNA\text{damage}(0) \cdot \exp(-k_{4p}' \cdot t)) - k_{3p}' \cdot p53 - Deg(t) \cdot p53 \cdot Mdm2$$

$$\frac{dMdm2}{dt} = k_{10p}' - k_{9p}' \cdot Mdm2 + k_{8p}' \cdot \frac{II^{9.0}}{Km^{9.0} + II^{9.0}}$$

$$\frac{dII}{dt} = k_{6p}' \cdot p53 \cdot \frac{DNA\text{damage}(0) \cdot \exp(-k_{4p}' \cdot t)}{1.0 + k_{5p}' \cdot p53 \cdot Mdm2} - k_{7p}' \cdot II$$

$$Deg(t) = Deg(0) - k_{deg}' \cdot (DNA\text{damage}(0) \cdot \exp(-k_{4p}' \cdot t) - DNA\text{damage}(0) \cdot \exp(-k_{damp}' \cdot DNA\text{damage}(0) \cdot t))$$

***G2/M phase cell cycle arrest***

$$\frac{dChk1}{dt} = k_{4c}' \cdot Chk1p - k_{3c}' \cdot Chk1 \cdot transducer$$

$$\frac{dChk1p}{dt} = k_{3c}' \cdot Chk1 \cdot transducer - k_{4c}' \cdot Chk1p$$

$$\frac{dtransducer}{dt} = k_{1c}' \cdot (DNA\text{damage}(0) \cdot \exp(-k_{4p}' \cdot t)) - k_{2c}' \cdot transducer$$

$$\frac{diMPF}{dt} = \frac{k_{19c}'}{1.0 + p53} + k_{21c}' \cdot aMPF \cdot Wee1 - k_{20c}' \cdot (aCdc25 + aCdc25p) \cdot iMPF$$

$$\frac{daMPF}{dt} = k_{20c}' \cdot (aCdc25 + aCdc25p) \cdot iMPF + k_{23c}' \cdot p21 \cdot aMPF - k_{21c}' \cdot aMPF \cdot Wee1 - k_{24c}' \cdot aMPF \cdot p21 - k_{22c}' \cdot aMPF \cdot aMPF$$

$$\frac{dp21}{dt} = -k_{65a}' \cdot p21 \cdot procaspase3 - k_{64a}' \cdot p21 \cdot caspase3 + k_{66a}' \cdot p21 \cdot procaspase3 + k_{25c}' \cdot p53 + k_{26c}' + k_{23c}' \cdot p21 \cdot aMPF - k_{27c}' \cdot p21 - k_{24c}' \cdot aMPF \cdot p21$$

$$\frac{dp21 \cdot aMPF}{dt} = k_{24c}' \cdot aMPF \cdot p21 - k_{23c}' \cdot p21 \cdot aMPF$$

$$\frac{diCdc25}{dt} = k_{9c}' \cdot aCdc25 + k_{8c}' - k_{10c}' \cdot aMPF \cdot iCdc25 - k_{11c}' \cdot Chk1p \cdot iCdc25$$

$$\frac{diCdc25p}{dt} = k_{13c}' \cdot aCdc25p + k_{11c}' \cdot Chk1p \cdot iCdc25 - k_{12c}' \cdot aMPF \cdot iCdc25p - k_{17c}' \cdot iCdc25p \cdot 14\_3\_3$$

$$\frac{daCdc25p : 14\_3\_3}{dt} = k_{17c}' \cdot iCdc25p \cdot 14\_3\_3 - k_{18c}' \cdot iCdc25 : 14\_3\_3$$

$$\frac{diCdc25}{dt} = k_{10c}' \cdot aMPF \cdot iCdc25 + k_{7c}' \cdot aCdc25p - k_{5c}' \cdot aCdc25 - k_{6c}' \cdot Chk1p \cdot aCdc25 - k_{9c}' \cdot aCdc25$$

$$\frac{daCdc25p}{dt} = k_{6c}' \cdot Chk1p \cdot aCdc25 + k_{12c}' \cdot aMPF \cdot iCdc25p - k_{7c}' \cdot aCdc25p - k_{13c}' \cdot aCdc25p$$

$$\frac{d14\_3\_3}{dt} = k_{14c}' \cdot p53 + k_{15c}' - k_{17c}' \cdot iCdc25p \cdot 14\_3\_3 - k_{16c}' \cdot 14\_3\_3$$

$$\frac{dWee1}{dt} = k_{31c}' + k_{29c}' \cdot Wee1p - k_{28c}' \cdot aMPF \cdot Wee1$$

$$\frac{dWee1p}{dt} = k_{28c}' \cdot aMPF \cdot Wee1 - (k_{29c}' + k_{30c}') \cdot Wee1p$$

---

### Apoptosis induction system

---

$$\frac{dApaf\_1}{dt} = -k'_{26a} \cdot Cyt_C \cdot Apaf\_1 + k'_{27a} \cdot Cyt_C : Apaf\_1 + k'_{24a} - k'_{25a} \cdot Apaf\_1$$

$$\frac{dCyt_C : Apaf\_1}{dt} = k'_{26a} \cdot Cyt_C \cdot Apaf\_1 - k'_{27a} \cdot Cyt_C : Apaf\_1 - 7.0 \cdot (k'_{28a} \cdot Cyt_C : Apaf\_1^p + k'_{29a} \cdot apoptosome)$$

$$\begin{aligned} \frac{dapoptosome}{dt} &= k'_{28a} \cdot Cyt_C : Apaf\_1^p - k'_{29a} \cdot apoptosome - k'_{34a} \cdot apoptosome \cdot procaspase9 \\ &\quad + k'_{33a} \cdot apoptosome : procaspase9 + k'_{32a} \cdot apoptosome : caspase9 - k'_{31a} \cdot apoptosome \cdot caspase9 \end{aligned}$$

$$\begin{aligned} \frac{dapoptosome : procaspase9}{dt} &= k'_{34a} \cdot apoptosome \cdot procaspase9 - k'_{33a} \cdot apoptosome : procaspase9 \\ &\quad - k'_{35a} \cdot apoptosome : procaspase9 \cdot procaspase9 + k'_{36a} \cdot apoptosome : procaspase9_2 \end{aligned}$$

$$\begin{aligned} \frac{dapoptosome : procaspase9_2}{dt} &= k'_{35a} \cdot apoptosome : procaspase9 \cdot procaspase9 \\ &\quad - k'_{36a} \cdot apoptosome : procaspase9_2 - k'_{39a} \cdot apoptosome : procaspase9_2 \end{aligned}$$

$$\begin{aligned} \frac{dapoptosome : caspase9_2}{dt} &= k'_{39a} \cdot apoptosome : procaspase9_2 - k'_{38a} \cdot apoptosome : caspase9_2 \\ &\quad + k'_{37a} \cdot apoptosome : caspase9 \cdot caspase9 - k'_{49a} \cdot apoptosome : caspase9_2 \cdot IAP \\ &\quad + k'_{50a} \cdot apoptosome : caspase9_2 : IAP - k'_{57a} \cdot apoptosome : caspase9_2 \cdot procaspase3 \\ &\quad + k'_{58a} \cdot apoptosome : caspase9_2 : procaspase3 + k'_{41a} \cdot apoptosome : caspase9_2 : procaspase3 \end{aligned}$$

$$\begin{aligned} \frac{dapoptosome : caspase9}{dt} &= k'_{38a} \cdot apoptosome : caspase9_2 - k'_{37a} \cdot apoptosome : caspase9 \cdot caspase9 \\ &\quad - k'_{32a} \cdot apoptosome : caspase9 + k'_{31a} \cdot apoptosome \cdot caspase9 \\ &\quad - k'_{48a} \cdot apoptosome : caspase9 \cdot IAP + k'_{47a} \cdot apoptosome : caspase9 : IAP \end{aligned}$$

$$\begin{aligned} \frac{dcaspase9}{dt} &= k'_{38a} \cdot apoptosome : caspase9_2 - k'_{37a} \cdot apoptosome : caspase9 \cdot caspase9 \\ &\quad + k'_{32a} \cdot apoptosome : caspase9 - k'_{31a} \cdot apoptosome \cdot caspase9 - k'_{51a} \cdot caspase9 \cdot IAP \\ &\quad + k'_{52a} \cdot caspase9 : IAP - k'_{45a} \cdot caspase9 \cdot procaspase3 + k'_{46a} \cdot caspase9 : procaspase3 \\ &\quad + k'_{44a} \cdot caspase9 : procaspase3 - k'_{69a} \cdot caspase9 \end{aligned}$$

$$\begin{aligned} \frac{dprocaspase9}{dt} &= -k'_{34a} \cdot apoptosome \cdot procaspase9 + k'_{33a} \cdot apoptosome : procaspase9 \\ &\quad - k'_{35a} \cdot apoptosome : procaspase9 \cdot procaspase9 + k'_{36a} \cdot apoptosome : procaspase9_2 \\ &\quad + k'_{40a} - k'_{30a} \cdot procaspase9 \end{aligned}$$

$$\begin{aligned} \frac{dIAP}{dt} &= -k'_{51a} \cdot caspase9 \cdot IAP + k'_{52a} \cdot caspase9 : IAP - k'_{48a} \cdot apoptosome : caspase9 \cdot IAP \\ &\quad + k'_{47a} \cdot apoptosome : caspase9 : IAP - k'_{49a} \cdot apoptosome : caspase9_2 \cdot IAP \\ &\quad + k'_{50a} \cdot apoptosome : caspase9_2 : IAP - k'_{56a} \cdot caspase3 \cdot IAP \\ &\quad + k'_{55a} \cdot caspase3 : IAP + k'_{53a} - k'_{54a} \cdot IAP \end{aligned}$$

$$\frac{dcaspase9 : IAP}{dt} = k'_{51a} \cdot caspase9 \cdot IAP - k'_{52a} \cdot caspase9 : IAP$$

$$\frac{dapoptosome : caspase9 : IAP}{dt} = k'_{48a} \cdot apoptosome : caspase9 \cdot IAP - k'_{47a} \cdot apoptosome : caspase9 : IAP$$

$$\frac{dapoptosome : caspase9_2 : IAP}{dt} = k'_{49a} \cdot apoptosome : caspase9_2 \cdot IAP - k'_{50a} \cdot apoptosome : caspase9_2 : IAP$$

Apoptosis induction system (continued)

$$\frac{dcaspase3 : IAP}{dt} = k'_{56a} \cdot caspase3 \cdot IAP - k'_{55a} \cdot caspase3 : IAP$$

$$\begin{aligned} \frac{dprocaspase3}{dt} = & -k'_{65a} \cdot p21 \cdot procaspase3 + k'_{66a} \cdot p21 : procaspase3 - k'_{45a} \cdot caspase9 \cdot procaspase3 \\ & + k'_{46a} \cdot caspase9 : procaspase3 - k'_{57a} \cdot apoptosome : caspase9_2 : procaspase3 \\ & + k'_{58a} \cdot apoptosome : caspase9_2 : procaspase3 + k'_{42a} - k'_{43a} \cdot procaspase3 \end{aligned}$$

$$\begin{aligned} \frac{dcaspase9 : procaspase3}{dt} = & k'_{45a} \cdot caspase9 \cdot procaspase3 - k'_{46a} \cdot caspase9 : procaspase3 \\ & - k'_{44a} \cdot caspase9 : procaspase3 \end{aligned}$$

$$\begin{aligned} \frac{dapoptosome : caspase9_2 : procaspase3}{dt} = & k'_{57a} \cdot apoptosome : caspase9_2 : procaspase3 \\ & - k'_{58a} \cdot apoptosome : caspase9_2 : procaspase3 - k'_{41a} \cdot apoptosome : caspase9_2 : procaspase3 \end{aligned}$$

$$\begin{aligned} \frac{dcaspase3}{dt} = & k'_{44a} \cdot caspase9 : procaspase3 + k'_{41a} \cdot apoptosome : caspase9_2 : procaspase3 \\ & - k'_{56a} \cdot caspase3 \cdot IAP + k'_{55a} \cdot caspase3 \cdot IAP - k'_{68a} \cdot caspase3 \cdot Bid + (k'_{59a} + k'_{67a}) \cdot caspase3 : Bid \\ & - k'_{61a} \cdot caspase3 \cdot Bcl\_2 + (k'_{60a} + k'_{62a}) \cdot caspase3 : Bcl\_2 - k'_{63a} \cdot caspase3 \end{aligned}$$

$$\frac{dcaspase8}{dt} = -k'_{3a} \cdot caspase8 \cdot Bid + k'_{2a} \cdot caspase8 : Bid + k'_{4a} \cdot caspase8 : Bid - k'_{1a} \cdot caspase8$$

$$\begin{aligned} \frac{dBid}{dt} = & -k'_{3a} \cdot caspase8 \cdot Bid + k'_{2a} \cdot caspase8 : Bid - k'_{68a} \cdot caspase3 \cdot Bid \\ & + k'_{67a} \cdot caspase3 : Bid + k'_{6a} - k'_{5a} \cdot Bid \end{aligned}$$

$$\frac{dcaspase8 : Bid}{dt} = k'_{3a} \cdot caspase8 \cdot Bid - k'_{2a} \cdot caspase8 : Bid - k'_{4a} \cdot caspase8 : Bid$$

$$\begin{aligned} \frac{dBcl\_2}{dt} = & -k'_{61a} \cdot caspase3 \cdot Bcl\_2 + k'_{60a} \cdot caspase3 : Bcl\_2 - k'_{13a} \cdot Bcl\_2 \cdot Bax \\ & + \frac{k'_{10a} \cdot p53_{threshold}^{4.0}}{p53^{4.0} + p53_{threshold}^{4.0}} - k'_{11a} \cdot Bcl\_2 \end{aligned}$$

$$\frac{dcaspase3 : Bid}{dt} = k'_{68a} \cdot caspase3 \cdot Bid - k'_{67a} \cdot caspase3 : Bid - k'_{59a} \cdot caspase3 : Bid$$

$$\frac{dcaspase3 : Bcl\_2}{dt} = k'_{61a} \cdot caspase3 \cdot Bcl\_2 - k'_{60a} \cdot caspase3 : Bcl\_2 - k'_{62a} \cdot caspase3 : Bcl\_2$$

$$\begin{aligned} \frac{dBax}{dt} = & -k'_{15a} \cdot tBid_{mito} \cdot Bax - k'_{18a} \cdot tBid : Bax \cdot Bax - k'_{13a} \cdot Bcl\_2 \cdot Bax \\ & + \frac{k'_{12a} \cdot (1.0 + p53^{4.0})}{p53^{4.0} + p53_{threshold}^{4.0}} - k'_{14a} \cdot Bax \end{aligned}$$

$$\frac{dtBid}{dt} = k'_{4a} \cdot caspase8 : Bid + k'_{59a} \cdot caspase3 : Bid - k'_{8a} \cdot tBid + k'_{18a} \cdot tBid : Bax \cdot Bax - k'_{7a} \cdot tBid$$

$$\frac{dtBid : Bax}{dt} = k'_{15a} \cdot tBid_{mito} \cdot Bax - k'_{18a} \cdot tBid : Bax \cdot Bax - k'_{17a} \cdot tBid : Bax$$

$$\frac{dCyt_{Cmito}}{dt} = -k'_{22a} \cdot Bax_2 \cdot Cyt_{Cmito} + k'_{20a} - k'_{21a} \cdot Cyt_{Cmito}$$

$$\frac{dBax_2}{dt} = k'_{18a} \cdot tBid : Bax \cdot Bax - k'_{19a} \cdot Bax_2$$

*Apoptosis induction system (continued)*

$$\frac{dtBid_{mito}}{dt} = k_{8a}' \cdot tBid - k_{15a}' \cdot tBid_{mito} \cdot Bax - k_{9a}' \cdot tBid_{mito}$$

$$\frac{dCyt_C}{dt} = k_{22a}' \cdot Bax_2 \cdot Cyt_{Cmito} - k_{26a}' \cdot Cyt_C \cdot Apaf_1 + k_{27a}' \cdot Cyt_C : Apaf_1 - k_{23a}' \cdot Cyt_C$$

$$\frac{dp21: procaspase3}{dt} = k_{65a}' \cdot p21 \cdot procaspase3 - k_{66a}' \cdot p21: procaspase3$$

---
