# Supplementary material for: Sophisticated Framework between Cell Cycle Arrest and Apoptosis Induction Based on p53 Dynamics
Source: PubMed Central journal article supplement (PMC2650779; doi:10.1371/journal.pone.0004795), 2009-03-10
Supplement: pone.0004795.s003.pdf [file pone.0004795.s003.pdf]

**Table S3** Initial conditions

---

***p53 oscillation system***

---

$p53(0)=0.0001$ ,  $Mdm2(0)=0.5875e-4$ ,  $I(0)=0.0$ ,  $Deg(0)=0.0556$

---

***G2/M phase cell cycle arrest***

---

$Chk1p(0)=2.5e-7$ ,  $Chk1(0)=0.24999975$ ,  $transducer(0)=0.05$ ,  $iMPF(0)=0.25e-6$ ,  
 $aMPF(0)=0.25e-8$ ,  $p21(0)=0.0$ ,  $p21:aMPF(0)=0.0$ ,  $Wee1p(0)=0.0$ ,  $iCdc25(0)=0.25e-6$ ,  
 $iCdc25Ps216(0)=0.5e-5$ ,  $iCdc25P:14_3_3(0)=0.0075$ ,  $aCdc25(0)=0.25e-6$ ,  
 $aCdc25Ps216(0)=0.0$ ,  $14-3-3(0)=0.5$ ,  $Wee1(0)=0.00025$

---

***Apoptosis induction system***

---

$Apaf_1(0)=0.004$ ,  $CytC:Apaf_1(0)=0.0$ ,  $apoptosome(0)=0.0$ ,  $apoptosome:procaspase9(0)=0.0$ ,  
 $apoptosome:procaspase9_2(0)=0.0$ ,  $apoptosome:caspase9_2(0)=0.0$ ,  
 $apoptosome:caspase9(0)=0.0$ ,  $caspase9(0)=0.0$ ,  $procaspase9(0)=0.004$ ,  $IAP(0)=0.004$ ,  
 $caspase9:IAP(0)=0.0$ ,  $apoptosome:caspase9:IAP(0)=0.0$ ,  $apoptosome:caspase9_2:IAP(0)=0.0$ ,  
 $caspase3:IAP(0)=0.0$ ,  $procaspase3(0)=0.004$ ,  $caspase9:procaspase3(0)=0.0$ ,  
 $apoptosome:caspase9_2:procaspase3(0)=0.0$ ,  $caspase3(0)=0.00001$ ,  $caspase8(0)=0.0001$ ,  
 $Bid(0)=0.004$ ,  $caspase8:Bid(0)=0.0$ ,  $Bcl_2(0)=0.004$ ,  $caspase3:Bid(0)=0.0$ ,  
 $caspase3:Bcl_2(0)=0.0$ ,  $Bax(0)=0.004$ ,  $tBid(0)=0.0$ ,  $tBid:Bax(0)=0.0$ ,  $CytC_{mito}(0)=0.004$ ,  
 $Bax_2(0)=0.0$ ,  $tBid_{mito}(0)=0.0$ ,  $CytC(0)=0.0$ ,  $p21:procaspase3(0)=0.0$

---
