# Supplementary material for: Sophisticated Framework between Cell Cycle Arrest and Apoptosis Induction Based on p53 Dynamics
Source: PubMed Central journal article supplement (PMC2650779; doi:10.1371/journal.pone.0004795), 2009-03-10
Supplement: pone.0004795.s004.pdf [file pone.0004795.s004.pdf]

**Table S4** Kinetic parameters

---

***p53 Oscillation system***

---

$k'_{1p}=0.000025$ ,  $k'_{2p}=1.5$ ,  $k'_{3p}=0.001$ ,  $k'_{4p}=1.0E-8$ ,  $k'_{5p}=0.004$ ,  $k'_{6p}=6.0$ ,  $k'_{7p}=0.005$ ,  $k'_{8p}=10.0$ ,  
 $k'_{9p}=0.02$ ,  $k'_{10p}=0.00094$ ,  $k_{ex}=1.0$ ,  $Km=9.5$ ,  $k_{damp}=0.02$ ,  $k_{deg}=0.772$

---

***G2/M phase cell cycle arrest***

---

$k'_{1c}=0.2$ ,  $k'_{2c}=1.0$ ,  $k'_{3c}=1.0$ ,  $k'_{4c}=1.0$ ,  $k'_{5c}=0.0001$ ,  $k'_{6c}=0.001$ ,  $k'_{7c}=0.01$ ,  $k'_{8c}=1.0e-5$ ,  $k'_{9c}=0.01$ ,  
 $k'_{10c}=1.0$ ,  $k'_{11c}=0.01$ ,  $k'_{12c}=1.0$ ,  $k'_{13c}=0.01$ ,  $k'_{14c}=0.01$ ,  $k'_{15c}=1.0$ ,  $k'_{16c}=1.0$ ,  $k'_{17c}=100.0$ ,  $k'_{18c}=1.0$ ,  
 $k'_{19c}=0.005$ ,  $k'_{20c}=1.0$ ,  $k'_{21c}=1.0$ ,  $k'_{22c}=0.01$ ,  $k'_{23c}=1.0$ ,  $k'_{24c}=0.1$ ,  $k'_{25c}=0.1$ ,  $k'_{26c}=0.01$ ,  $k'_{27c}=1.0$ ,  
 $k'_{28c}=0.1$ ,  $k'_{29c}=1.0$ ,  $k'_{30c}=1.0$ ,  $k'_{31c}=2.0E-4$

---

***Apoptosis induction system***

---

$k'_{1a}=0.006$ ,  $k'_{2a}=0.5$ ,  $k'_{3a}=10.0$ ,  $k'_{4a}=0.1$ ,  $k'_{5a}=0.006$ ,  $k'_{6a}=0.00003$ ,  $k'_{7a}=0.006$ ,  $k'_{8a}=10.0$ ,  $k'_{9a}=0.006$ ,  
 $k'_{10a}=8.0E-5$ ,  $k'_{11a}=0.006$ ,  $k'_{12a}=3.0E-5$ ,  $k'_{13a}=10.0$ ,  $k'_{14a}=0.006$ ,  $k'_{15a}=10.0$ ,  $k'_{17a}=0.006$ ,  $k'_{18a}=10.0$ ,  
 $k'_{19a}=0.006$ ,  $k'_{20a}=0.0003$ ,  $k'_{21a}=0.006$ ,  $k'_{22a}=10.0$ ,  $k'_{23a}=0.006$ ,  $k'_{24a}=0.0003$ ,  $k'_{25a}=0.006$ ,  $k'_{26a}=5.0$ ,  
 $k'_{27a}=0.5$ ,  $k'_{28a}=5.0E+4$ ,  $k'_{29a}=0.5$ ,  $k'_{30a}=0.006$ ,  $k'_{31a}=0.5$ ,  $k'_{32a}=5.0$ ,  $k'_{33a}=0.5$ ,  $k'_{34a}=10.0$ ,  $k'_{35a}=10.0$ ,  
 $k'_{36a}=0.5$ ,  $k'_{37a}=0.5$ ,  $k'_{38a}=5.0$ ,  $k'_{39a}=0.1$ ,  $k'_{40a}=0.0003$ ,  $k'_{41a}=0.1$ ,  $k'_{42a}=0.0003$ ,  $k'_{43a}=0.006$ ,  
 $k'_{44a}=0.001$ ,  $k'_{45a}=10.0$ ,  $k'_{46a}=0.5$ ,  $k'_{47a}=0.0035$ ,  $k'_{48a}=5.0$ ,  $k'_{49a}=5.0$ ,  $k'_{50a}=0.0035$ ,  $k'_{51a}=5.0$ ,  
 $k'_{52a}=0.0035$ ,  $k'_{53a}=3.0E-5$ ,  $k'_{54a}=0.006$ ,  $k'_{55a}=0.0035$ ,  $k'_{56a}=5.0$ ,  $k'_{57a}=10.0$ ,  $k'_{58a}=0.5$ ,  $k'_{59a}=0.1$ ,  
 $k'_{60a}=10.0$ ,  $k'_{61a}=0.5$ ,  $k'_{62a}=0.1$ ,  $k'_{63a}=0.006$ ,  $k'_{64a}=1.0$ ,  $k'_{65a}=0.1$ ,  $k'_{66a}=1.0$ ,  $k'_{67a}=0.5$ ,  $k'_{68a}=10.0$ ,  
 $k'_{69a}=0.006$ ,  $p53_{threshold}=0.4$ ,  $p=4.0$

---
