# Supplementary material for: Sophisticated Framework between Cell Cycle Arrest and Apoptosis Induction Based on p53 Dynamics
Source: PubMed Central journal article supplement (PMC2650779; doi:10.1371/journal.pone.0004795), 2009-03-10
Supplement: pone.0004795.s008.pdf [file pone.0004795.s008.pdf]

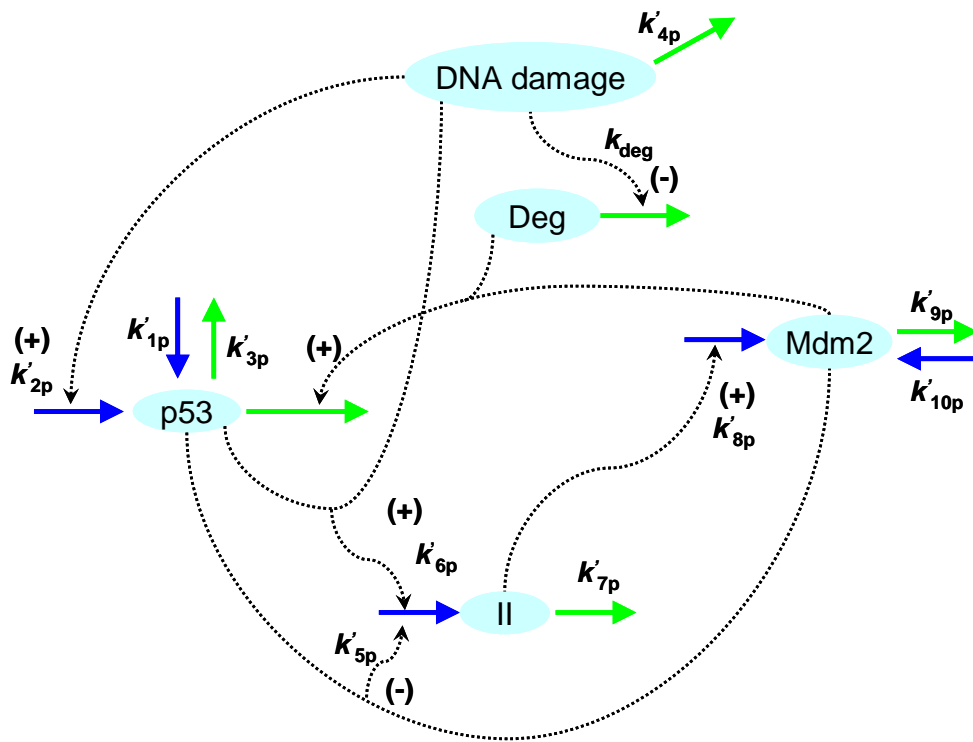

**Figure S4.** p53 activation of the p53 oscillation system.

Blue and green thick arrows represent the synthetic and degradation processes, respectively. Dashed arrows with a plus sign represent a positive interaction, while dashed arrows with a minus sign represent negative interactions.
