# Supplementary material for: Sophisticated Framework between Cell Cycle Arrest and Apoptosis Induction Based on p53 Dynamics
Source: PubMed Central journal article supplement (PMC2650779; doi:10.1371/journal.pone.0004795), 2009-03-10
Supplement: pone.0004795.s013.pdf [file pone.0004795.s013.pdf]

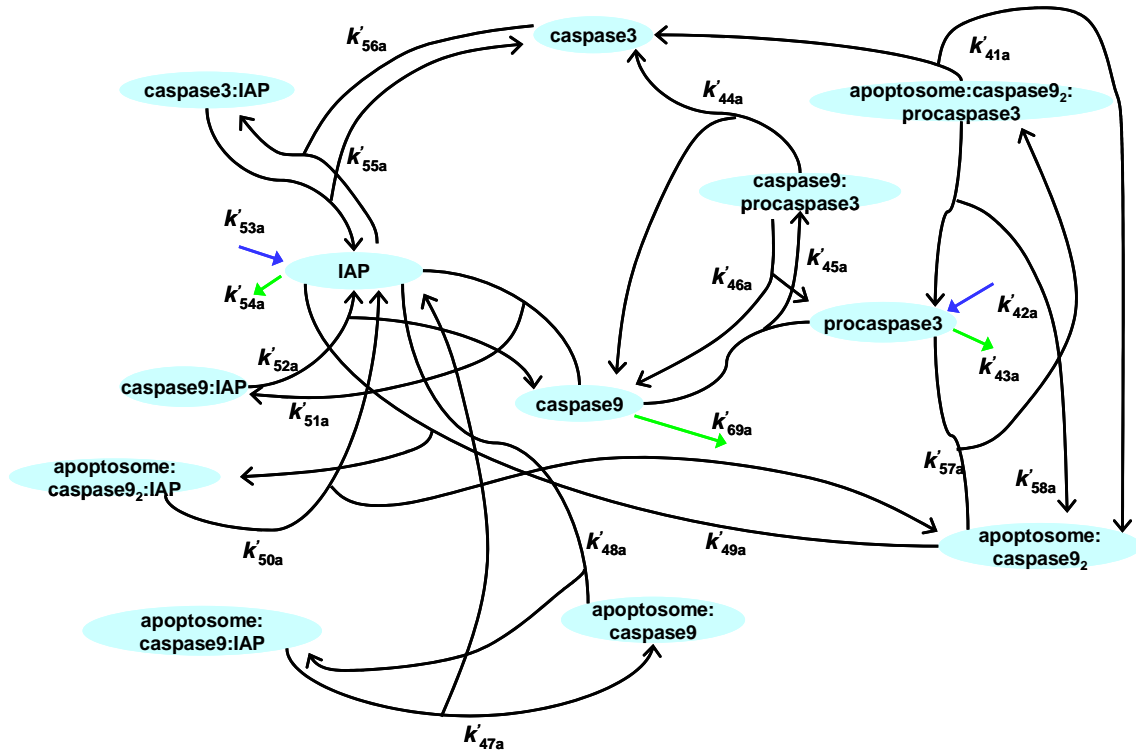

**Figure S9** Caspase cascade in apoptosis (II)

Blue and green thick arrows represent the synthetic and degradation processes, respectively. Black arrows show the reaction process.
