# Supplementary material for: Sophisticated Framework between Cell Cycle Arrest and Apoptosis Induction Based on p53 Dynamics
Source: PubMed Central journal article supplement (PMC2650779; doi:10.1371/journal.pone.0004795), 2009-03-10
Supplement: pone.0004795.s014.pdf [file pone.0004795.s014.pdf]

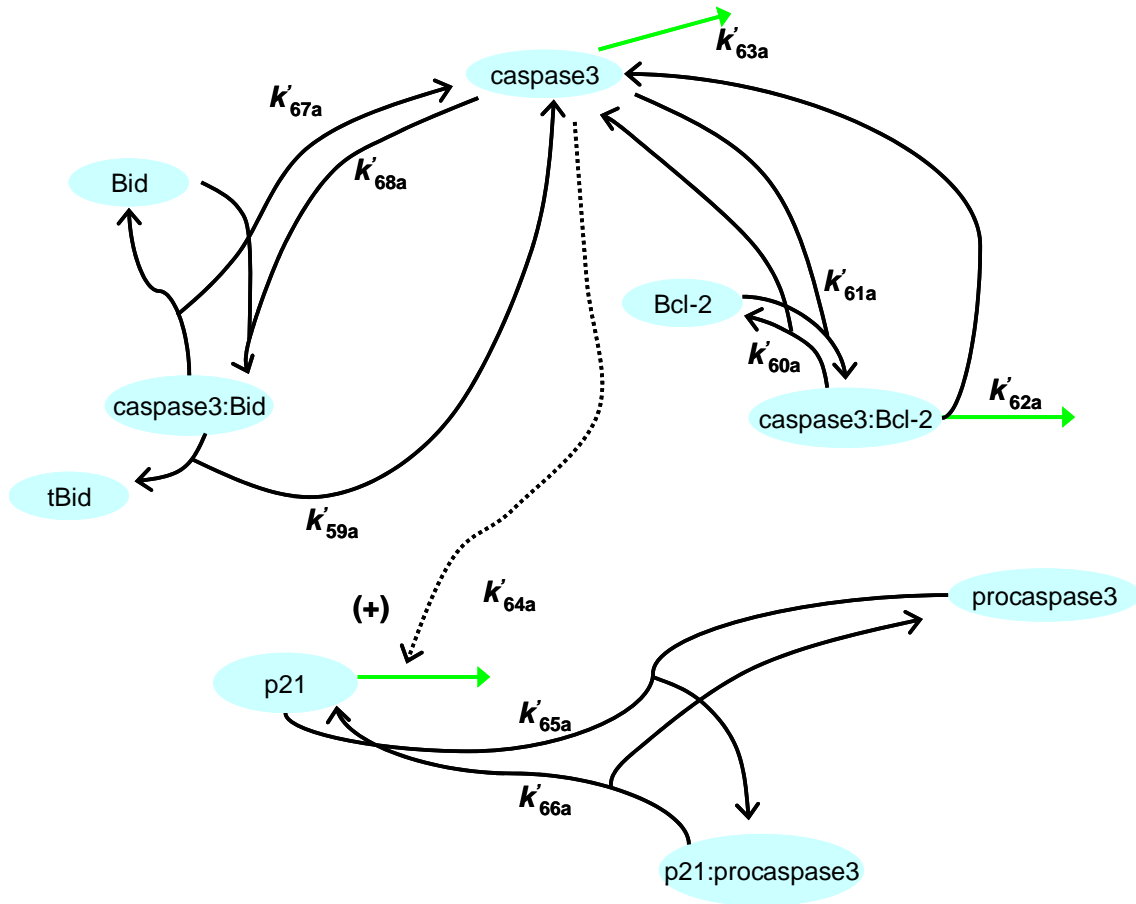

**Figure S10.** Regulation of caspase3 in the apoptosis induction system.

Green thick arrows represent the degradation process. Black arrows show the reaction process. Dashed arrows with a plus sign represent a positive interaction.
